# Supplementary material for: MiRNA-424-5p Suppresses Proliferation, Migration, and Invasion of Clear Cell Renal Cell Carcinoma and Attenuates Expression of O-GlcNAc-Transferase
Source: MDPI journal article supplement (doi:10.3390/cancers13205160), 2021-10-14
Supplement: s1 [file s1]

# MiRNA-424-5p Suppresses Proliferation, Migration, and Invasion of Clear Cell Renal Cell Carcinoma and Attenuates Expression of O-GlcNAc-Transferase

Thomas J. Kalantzakos, Travis B. Sullivan, Thales Gloria, David Canes, Alireza Moinzadeh and Kimberly M. Rieger-Christ

(A)

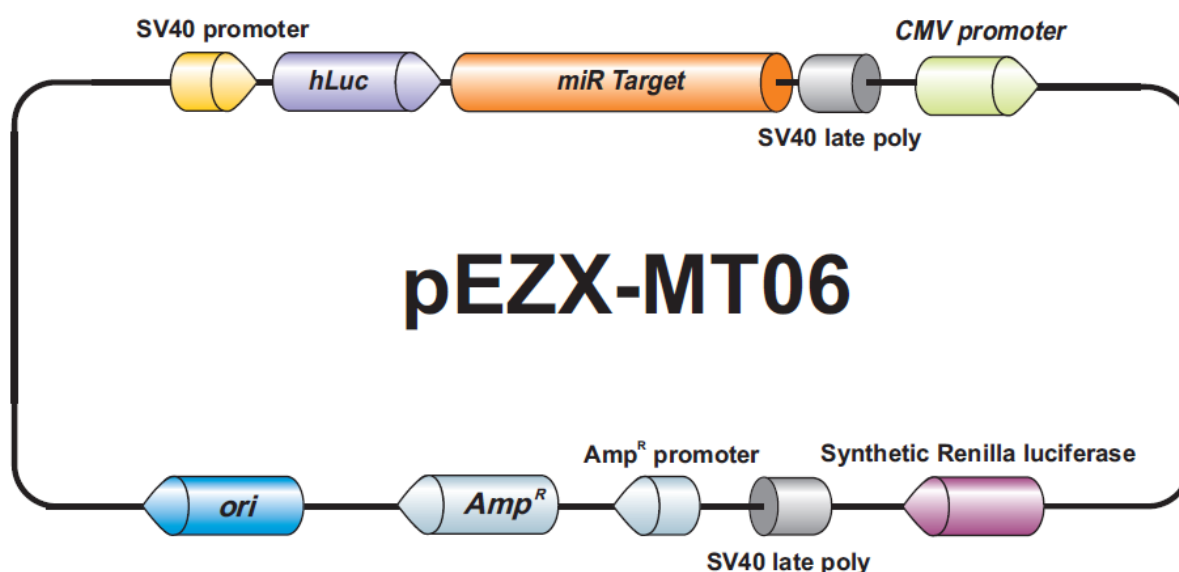

(B)

3' UTR OGT (NM\_181673.3)

Wild type

```
ataaagactgcacaggagaattaccctatacctgagcctcaaccttctgggggaaaggg
aactagataacatacttcttacttgtctgtacagtaccttgttgcagatgggtgatatat
aatggtaatagaatagcacagccagacttgccttcctgcatggtagggagagacacaaaag
atgggaaactgcttttccacaaggaatctccgtagaattttgcggcgaccagatggtgca
taggtctggaaggctctgatctcccttggctcttccatgggatgggttagtgtggaggggaga
tatagattgtccggcgcgtttgtgattccatggattgattcagtccttctggatttttttt
tctttatatattttgggtactggagcttttaaaaatgtttggtttcaggtatttttattcat
gtgaagtgtatatgattctcttgagataagggttttaagctaaaatgttactccctgtttt
agtttctgaactctgacagattgacagggactttgctgggtgtagtccttttatagggtttt
ataaaccacttgagcctatatcagtcgttttagtgtctgacctaatatttgagctatca
gtgctttgttgatttagatgatgactcaagattttttctgggtccatttcccatttccttt
tcttccctgacccccataccctcacccttaaaattctcctgtaactcaactaacaaaatc
aagcctgattcaaaacatcctagggtgttttaaacacaccatctggtgccaaatgaagat
ttttaggagtgattactaattatcaagggcacagttgtggtactgtcattgataataata
tagtttttttttttttcttaattttgacctgtttcaccagtgttttacccttgactgcc
cttctatgctgcttccaaaagtgatagtggtgtgtaagatttttaccttccctttctaaagt
```

tttttttttttttttttaagtgagtcctgttcttcctattttctttcagcagaaatgaaat  
cccaggtaagtataagttattcaagttattgatcagtaagtcacagttatctccagtgc  
taaataaccttcatcaagaaataggttataggtaaaatctctgaaggatcatctatgtat  
tcaagtaattattttttagataataactgtcttctggacttgggtcttgaagtctgtacag  
attcagcctcagtagtagcgaactgcactgctgtttgggttggagtacaaattagactta  
tagtcctcctggaacttgagttattaaaatcataggaataaaattatgggatctcaacaa  
agggctcgaggggtttgaggcttaacaagccaacatatgaatatatgttttgtctcgctat  
actgcacttacgctatccagttgcaggtaatttttgtctgctagtagtggtctagatta  
tgtctttccaaagcgctgagggtgtgcacctattctgtagttgcagctgatgcctgaatg  
tatectagctgacaaattattgattaataagaacttgaatttctggaagattcttactgt  
taaccaaattttgagcaaggagttctcaaaggtaattctgaaccagaattacatgttaatg  
aacagtgtagcttttaacagtgtaaatcacggaatatccgtgaagggtatttcttaattta  
ttttttaccgggttgattgaaatatcagttaaagggttgcagcatggttgcagataaaactg  
atgtttgaaattcgctgaaatacttaatgtggaataggataatatacttccaatgccctc  
aaggctgtgaccttacagccattttacatagcacatcattcctcctatagggatgaactt  
tttctgggcacgaaaagtagccgctctggttgaagctttgcttattgtaacaggctttta  
tttccaggtaatatgtcttgggaagacttaattctgattagagatatagatattactggaa  
actaattgtttttttctattgtactctgctttatcaaagaagtaaaacatttaaatcgt  
actacagaaattaagatgttgtcttgcgatcccttaataaatgaatgatttcccttta

mutation targeting region 513

ataaagactgcacaggagaattaccctatacctgagcctcaaccttctgggggaaagg  
aactagataacatacttcttacttgtctgtacagtaccttgttgcagatgggtgatata  
aatggtaatagaatagcacagccagacttgccttctgcatggtaggagagacacaaaag  
atgggaaactgcttttccacaaggaatctccgtagaattttgcggcgaccagatggtgca  
taggtctggaaggctctgatctcccttgggtcttccatgggatgggttagtggtgaggggaga  
tatagattgtccggccgctttgtgattccatggattgattcagtccttctggattttttt  
tctttatatatttgggtactggagcttttaaaaatgtttggtttcaggatattttattcat  
gtgaagtgtatatgattctcttgagataagggttttaagctaaaatgttactccctgtttt  
agtttctgaactctgagtggttgtgtgcttaacgacgagtagtctttttatagggtttt  
ataaaccacttgagcctatatcagtcggttttagtgctgacctaataatttggagctatca  
gtgctttgttgatttagatgatgactcaagattttttctgggtccatttccatttccctt  
tcttccctgacccccataccctcacccttaaaattctcctgtaactcaactaacaaaatc  
aagcctgattcaaaacatccatagggtgttttaaacacaccatctggtgccaaatgaagat  
ttttaggagtgattactaattatcaagggcacagttgtggtactgtcattgataataata  
tagtttttttttttccctaattttgacctgtttcaccagtgttttacccttgactgccc  
cttctatgctgcttccaaaagtgatagtggtgtgaagatttttacccttcccttctaaagt  
tttttttttttttttaagtgagtcctgttcttcctattttctttcagcagaaatgaaat  
cccaggtaagtataagttattcaagttattgatcagtaagtcacagttatctccagtgc  
taaataaccttcatcaagaaataggttataggtaaaatctctgaaggatcatctatgtat  
tcaagtaattattttttagataataactgtcttctggacttgggtcttgaagtctgtacag  
attcagcctcagtagtagcgaactgcactgctgtttgggttggagtacaaattagactta

tagtcctcctggaacttgagttattaaaatcataggaataaaaattatgggatctcaacaa  
agggtcgaggggtttgaggcttaacaagccaacatatgaatatatgttttgtctcgctat  
actgcacttacgctatccagttgcaggtaatTTTTGTCTGCTAGTAGTGTCTAGATTA  
tgtctttccaaagcgctgaggctgtgcacctattctgtagttgcagctgatgcctgaatg  
tatacctagctgacaaaattattgattaataagaacttgaatttctggaagattcttactgt  
taaccaaattttgagcaaggagtctcaaaggtaattctgaaccagaattacatgttaatg  
aacagtgtaccttttaacagtgtaaatcacggaatatccgtgaagggttttcttaattta  
ttttttaccgggttgattgaaatatcagttaaagggtgccagcatgggtgcagataaaactg  
atgtttgaaattcgctgaaatacttaatgtggaataggataatatacttccaatgccctc  
aaggctgtgaccttacagccattttacatagcacatcattcctcctatagggatgaactt  
tttctgggcacgaaaagtagccgctctgggtgaagctttgcttattgtaacaggctttta  
tttcaggtaatatgtcttggaagacttaattctgattagagatatagatattactggaa  
actaattgtttttttctattgtactctgctttatcaaagaagtaaaacatttaaatcgt  
actacagaaattaagatgttgtcttgcatccttaataaatgaatgatttcccttta

#### mutation targeting region 907

ataaagactgcacaggagaattaccctatacctgagcctcaaccttctgggggaaagg  
aactagataacatacttcttacttgtctgtacagtaccttgttgcagatgggtgatatat  
aatggtaatagaatagcacagccagacttgcttcctgcatggtagggagagacacaaaag  
atgggaaactgcttttccacaaggaatctccgtagaattttgcggcgaccagatggtgca  
taggtctggaaggctctgatctcccttgggtcttccatgggatgggttagtgtggaggggaga  
tatagattgtccggccgcttctgtgattccatggattgattcagtcttctggattttttt  
tctttatatatttgggtactggagcttttaaaaatgtttgggttcaggatattttattcat  
gtgaagtgtatatgattctcttgagataagggttttaagctaaaatgttactccctgtttt  
agtttctgaactctgacagattgacagggactttgctgggtgtagtctttttatagggttt  
ataaaccacttgagcctatatcagtcgttttagtgtctgacctaatatttggagctatca  
gtgctttgttgatttagatgatgactcaagatttttctgggtccatttcccatttccttt  
tcttccctgacccccataccctcacccttaaaattctcctgtaactcaactaacaaaatc  
aagcctgattcaaaacatcctaggggtgttttaaacacaccatctggtgccaaatgaagat  
ttttaggagtgattactaattatcaagggcacagttgtggtactgtcattgataataata  
tagtttttttttttcttaattttgacctgtttcaccagtgttttacccttgactgccc  
cttctaacgacgatccaaaagtgatagtggtgtgtaagatttttaccttcttttctaaagt  
tttttttttttttttaagtgagtcctgttcttctctatttctttcagcagaaatgaaat  
cccaggtaagtataagtattcaagtatttgatcagtaagtcacagttatctccagtgc  
taaataaccttcatcaagaaataggttataggtaaaatctctgaaggatcatctatgtat  
tcaagtaattatttttagataataactgtcttctggacttgggtcttgaagtctgtacag  
attcagcctcagtagtagcgaactgcactgctgtttgggttggagtacaaattagactta  
tagtcctcctggaacttgagttattaaaatcataggaataaaaattatgggatctcaacaa  
agggtcgaggggtttgaggcttaacaagccaacatatgaatatatgttttgtctcgctat  
actgcacttacgctatccagttgcaggtaatTTTTGTCTGCTAGTAGTGTCTAGATTA  
tgtctttccaaagcgctgaggctgtgcacctattctgtagttgcagctgatgcctgaatg  
tatacctagctgacaaaattattgattaataagaacttgaatttctggaagattcttactgt

taaccaaatttttgagcaaggagtctcaaaggtaattctgaaccagaattacatgttaatg  
aacagtgtaccttttaacagtgtaaatcacggaatatccgtgaagggttttcttaattta  
ttttttaccggttgattgaaatatcagttaaagggttgccagcatgggtgcagataaaactg  
atgtttgaaattcgctgaaatacttaatgtggaataggataatatacttccaatgccctc  
aaggctgtgaccttacagccattttacatagcacatcattcctcctatagggatgaactt  
tttcctggcgacgaaaagtagccgctctgggtgaagctttgcttattgtaacagggtttta  
tttcaggtaatatgtcttggaagacttaattctgattagagatatagatattactggaa  
actaattgttttttttctattgtactctgctttatcaaagaagtaaaacattttaaatcgt  
actacagaaattaagatgttgtcttgcgatccttaataaatgaatgatttccctttta

mutation targeting region 1220

ataaagactgcacaggagaattacccctatacctgagcctcaaccttctgggggaaaggg  
aactagataacatacttcttacttgtctgtacagtaccttgttgcatgggtgatataat  
aatggtaatagaatagcacagccagacttgcttctgcatggtagggagagacacaaaag  
atgggaaactgcttttccacaaggaatctccgtagaattttgcggcgaccagatgggtgca  
taggtctggaaggctctgatctcccttggtcttccatgggatgggttagtgtggaggggaga  
tatagattgtccggccgctttgtgattccatggattgattcagtcttctggatttttttt  
tctttatatatttgggtactggagcttttaaaaatgtttggtttcaggatatttttattcat  
gtgaagtgtatatgattctcttgagataagggttttaagctaaaatgttactccctgtttt  
agtttctgaactctgacagattgacagggactttgctgggtgtagtctttttatagggtttt  
ataaaccacttgagcctatatcagtcgttttagtgtctgacctaataatttggagctatca  
gtgctttgttgatttagatgatgactcaagattttttctggtccatttcccatttccctt  
tcttccctgacccccataccctcacccctaaaattctcctgtaactcaactaacaaaatc  
aagcctgattcaaaacatcctagggtgttttaaacacaccatctggtgccaaatgaagat  
ttttaggagtgttactaattatcaagggcacagttgtggtactgtcattgataataata  
tagtttttttttttttcttaattttgacctgtttcaccagtgttttacccttgactgccc  
cttctatgctgcttccaaaagtgtatgtgtgtgaagatttttaccttcccttctaaagt  
tttttttttttttttaagtgagtcctgttcttctctatttctttcagcagaaatgaaat  
cccaggtaagtataagtattcaagtatttgatcagtaagtcacagttatctccagtgcac  
taataaaccttcatcaagaaatagggttataggtaaaatctctgaaggatcatctatgtat  
tcaagtaattatttttttagataataactgtcttctggacttgggtcttgaagtctgtacag  
attcagcctcagtagtagcgtactgtcagcactatgggttgaggtacaaattagactta  
tagtcctcctggaacttgagttattaaaatcataggaataaaaattatgggatctcaacaa  
agggtcgaggggttgagggttaaacagccaacatatgaatatatgtttgtctcgctat  
actgcacttacgctatccagttgcaggtaatttttgtctgctagtagtgttctagatta  
tgtctttccaaagcgtgaggctgtgcacctattctgtagttgcagctgatgcctgaatg  
tatcctagctgacaaattattgattaataagaacttgaatttctggaagattcttactgt  
taaccaaatttttgagcaaggagtctcaaaggtaattctgaaccagaattacatgttaatg  
aacagtgtaccttttaacagtgtaaatcacggaatatccgtgaagggttttcttaattta  
ttttttaccggttgattgaaatatcagttaaagggttgccagcatgggtgcagataaaactg  
atgtttgaaattcgctgaaatacttaatgtggaataggataatatacttccaatgccctc  
aaggctgtgaccttacagccattttacatagcacatcattcctcctatagggatgaactt

tttcctggcagcagaaaagtagccgctctggttgaagctttgcttattgtaacaggctttta  
 tttccaggtaatatgtcttggaagacttaattctgattagagatatagatattactggaa  
 actaattgtttttttctattgtactctgctttatcaaagaagtaaaacatttaaactcgt  
 actacagaaattaagatgttgtcttgcatccttaataaatgaatgatttccttttaa

**Figure S1:** OGT 3'UTR vector. (A) Vector map for the Genecopoeia vector containing the 3'UTR of OGT. (B) The sequence of the 3'UTR of OGT. The entire sequence of the OGT 3'UTR was inserted into the vector. Four separate vectors were utilized containing unique 3' UTRs: wild type, mutation targeting region 513, mutation targeting region 907, and mutation targeting region 1220.

(A)

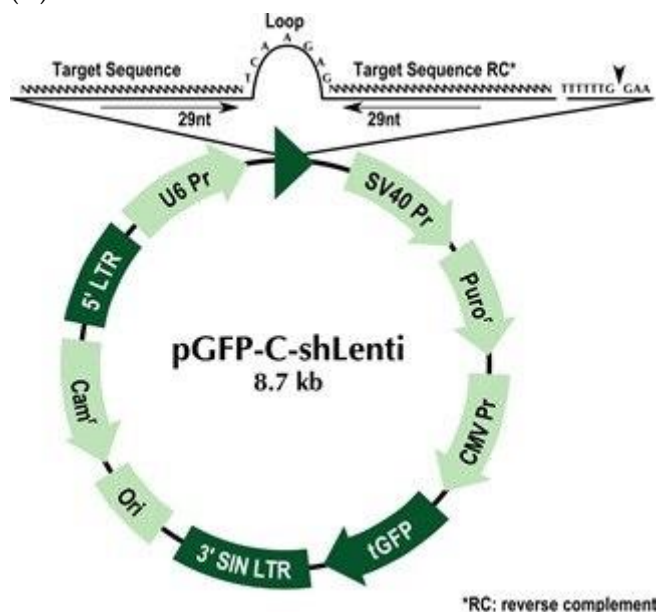

(B)

TL302811VB – CTGACCACATGATTAAGCCTGTTGAAGTC (utilized in cell line 786-O)

TL302811VD – TCCTGATGCTTATTGTAAGTGGCTCATT (utilized in cell line HTB-46)

TR30021V Lenti shRNA scramble control particles – GCACTACCAGAGCTAACTCAGATAGTACT

**Figure S2:** shRNA OGT vector. (A) Map for the Origene Lenti Cloning Vector (pGFP-C-shLenti Vector) with shRNA against OGT. (B) The shRNA sequences utilized in this study.

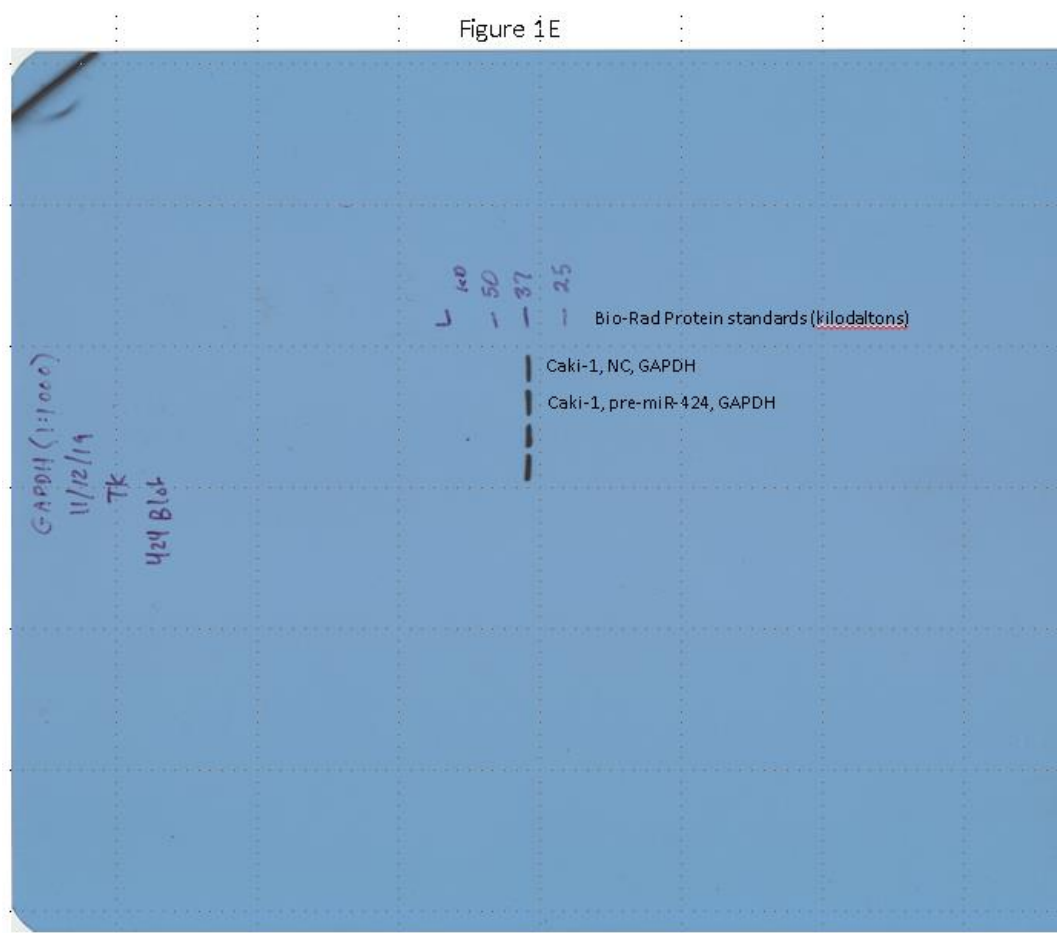

Figure S3.: Original representative blot for the GAPDH protein expression of cell line Caki-1 transfected with pre-miR-424-5p after 48 h

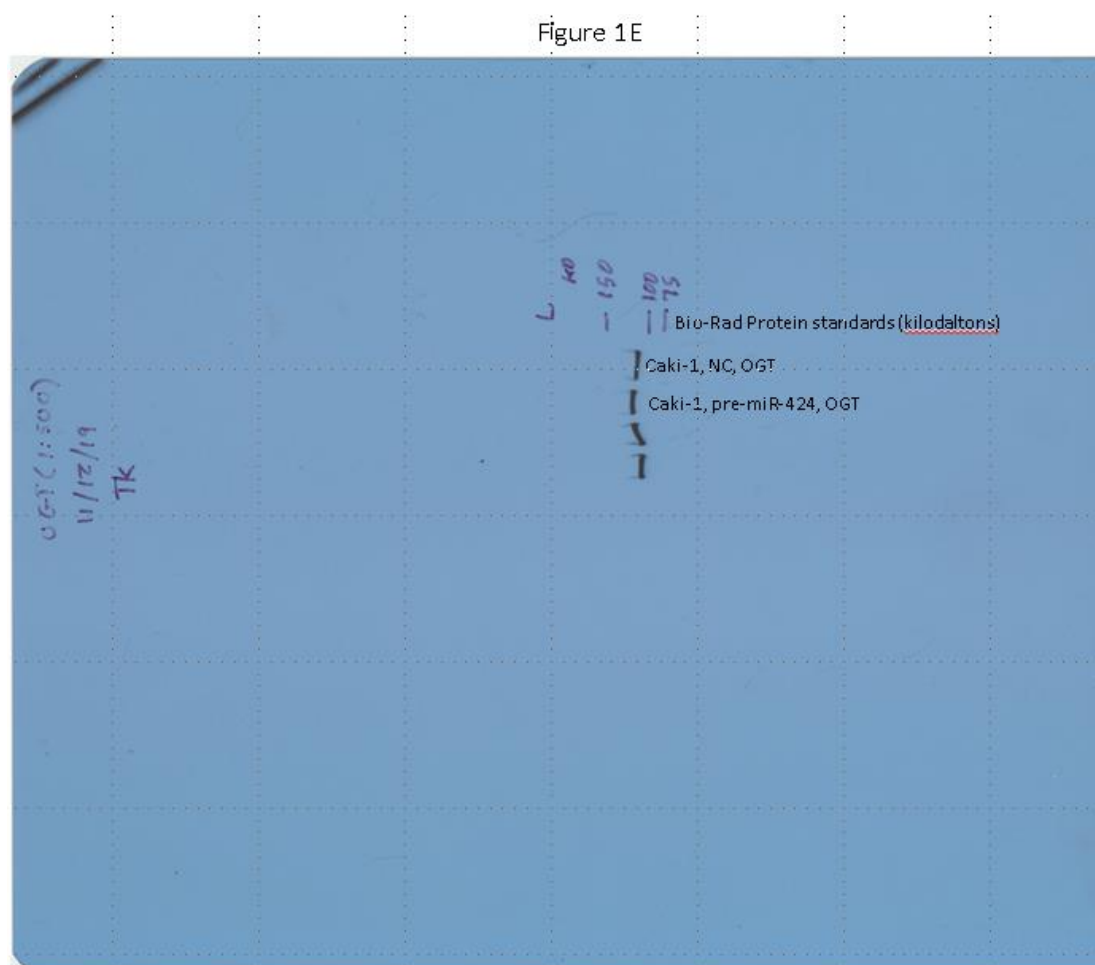

**Figure S4.:** Original representative blot for the OGT protein expression of cell line Caki-1 transfected with pre-miR-424-5p after 48 h

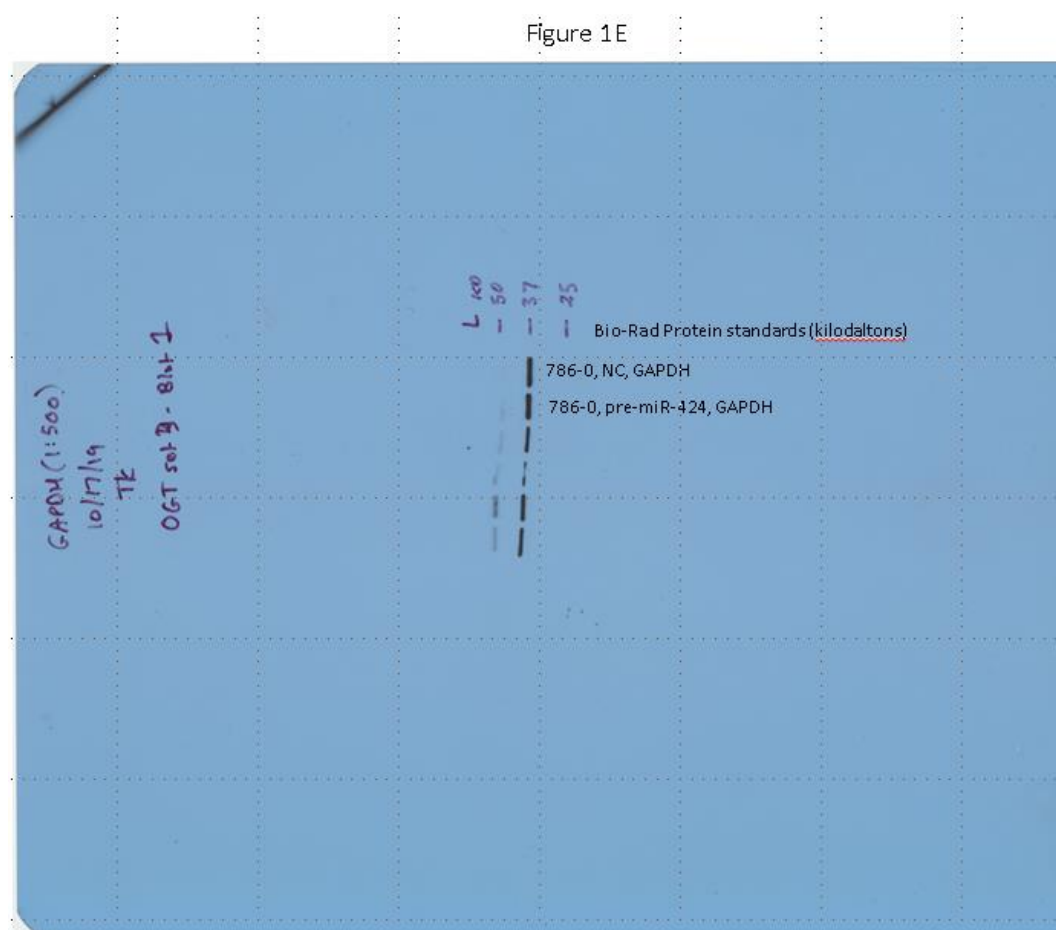

**Figure S5.:** Original representative blot for the GAPDH protein expression of cell line 786-O transfected with pre-miR-424-5p after 48 h



Figure 1E

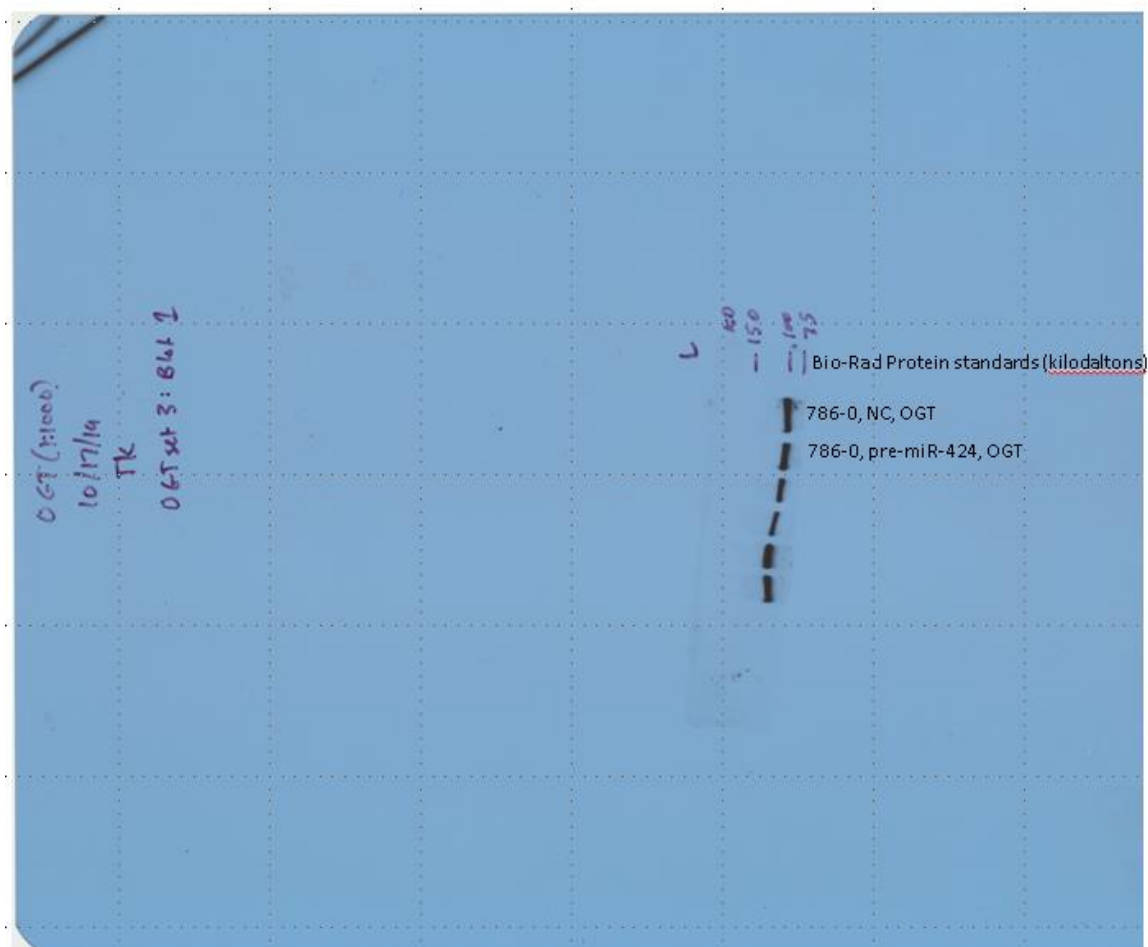

Figure S6.: Original representative blot for the OGT protein expression of cell line 786-O transfected with pre-miR-424-5p after 48

Figure 2E

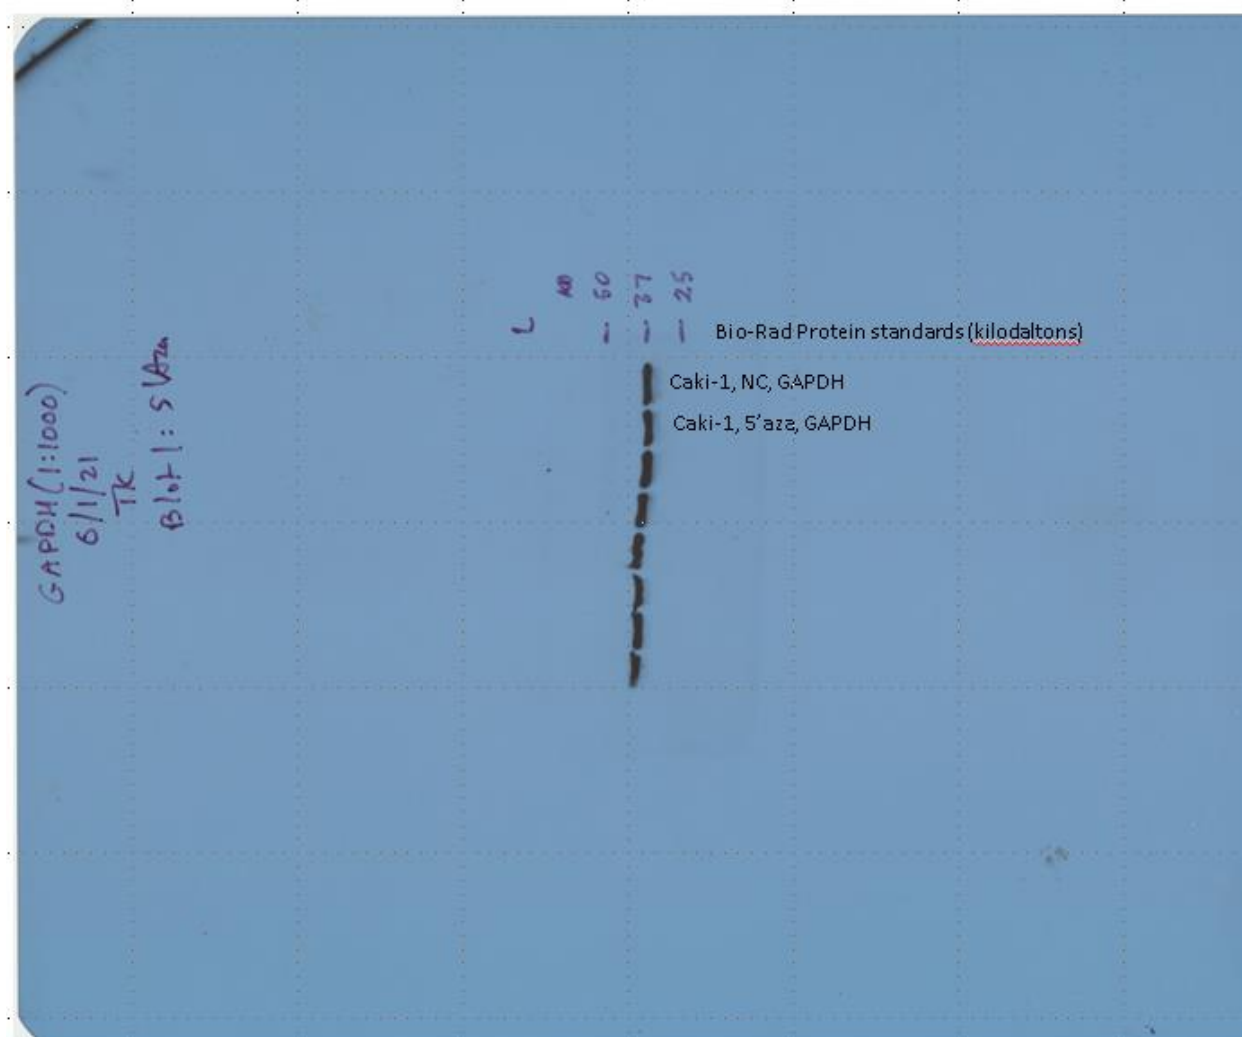

Figure S7.: Original representative blot for the GAPDH protein expression of the cell line Caki-1 treated with 5'aza after 48 h

Figure 2E

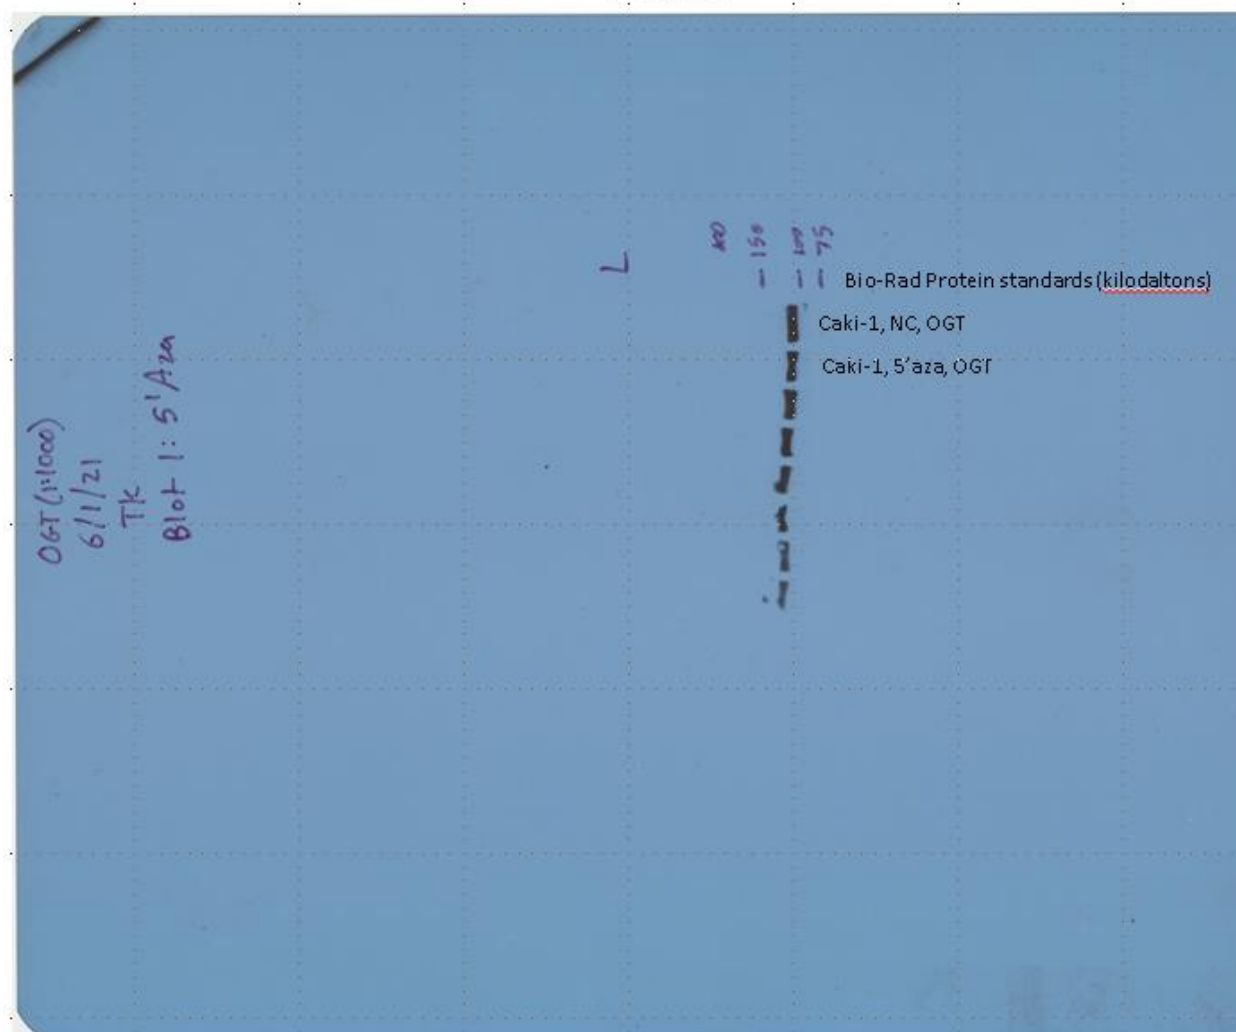

**Figure S8.:** Original representative blot for the OGT protein expression of the cell line Caki-1 treated with 5'aza after 48 h

Figure 2E

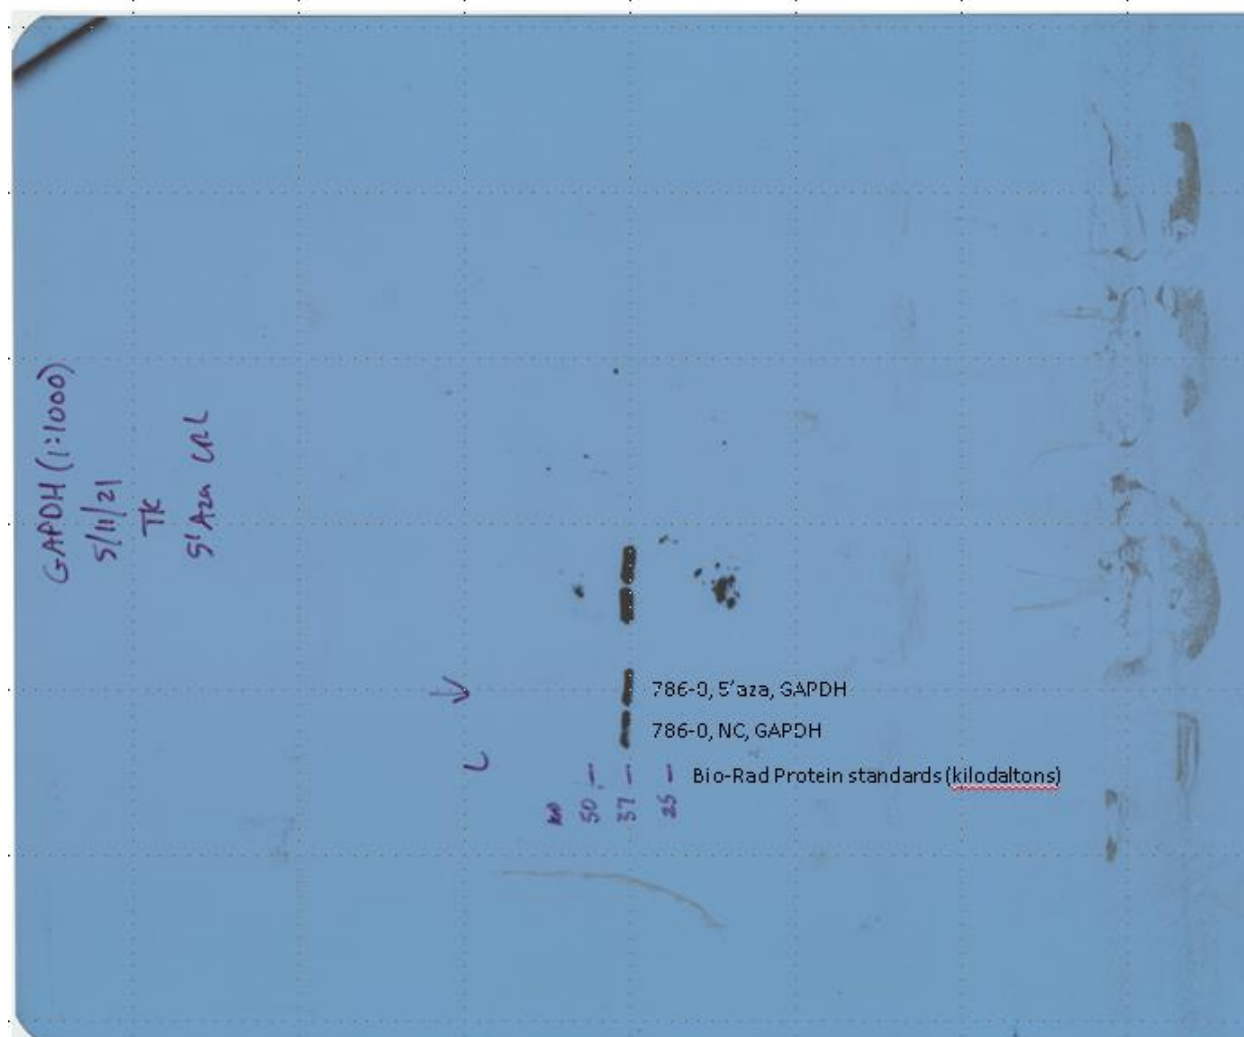

Figure S9.: Original representative blot for the GAPDH protein expression of the cell line 786-O treated with 5'aza after 48h

Figure 2E

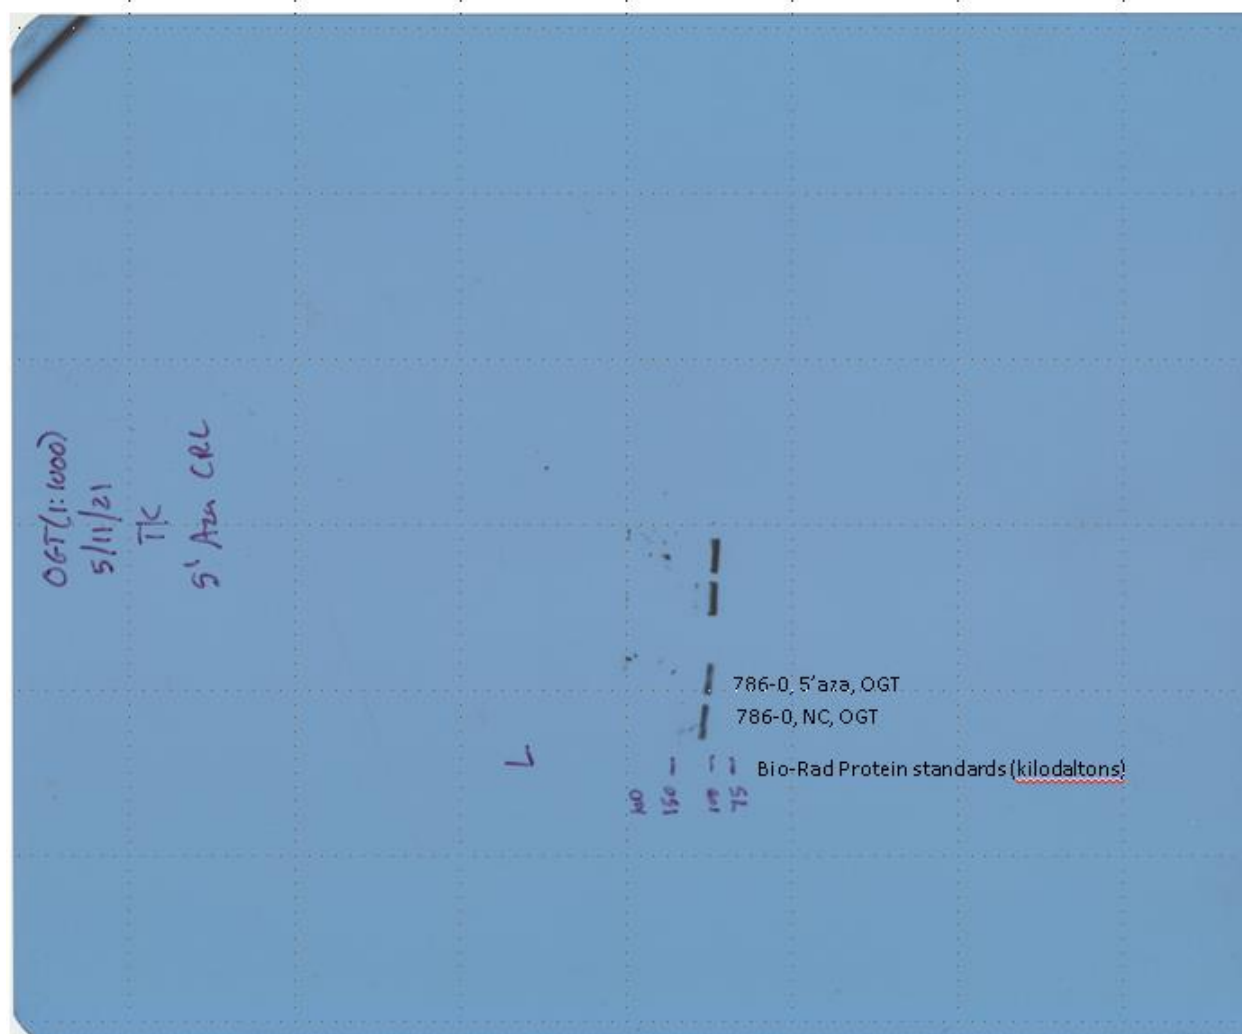

**Figure S10.:** Original representative blot for the OGT protein expression of the cell line 786-O treated with 5'aza after 48h

Figure 3A

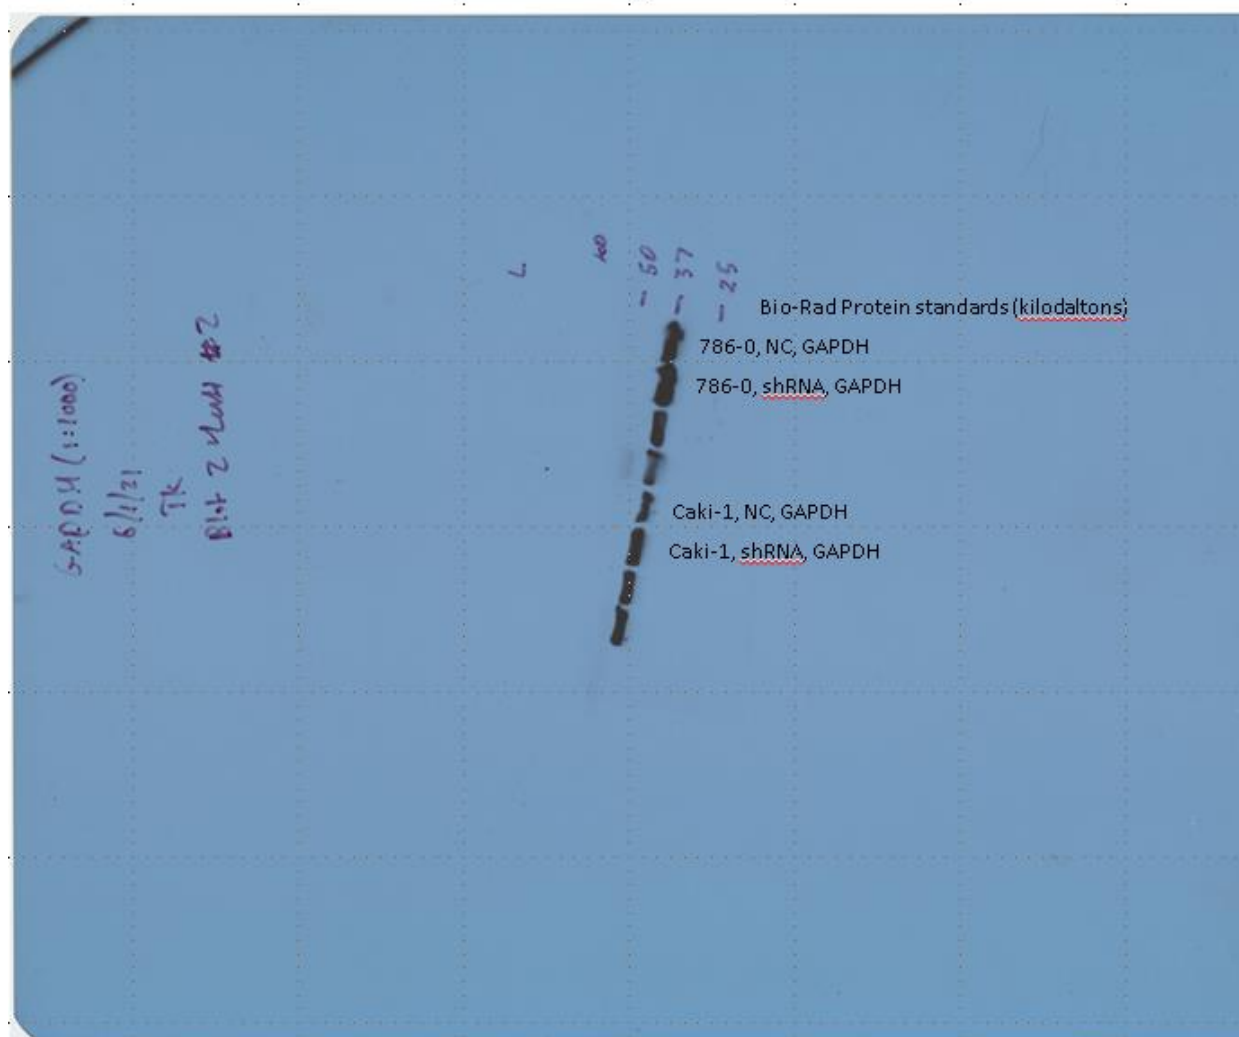

**Figure S11.:** Original representative blot for the GAPDH protein expression of the cell lines 786-O and Caki-1 treated with OGT shRNA

Figure 3A

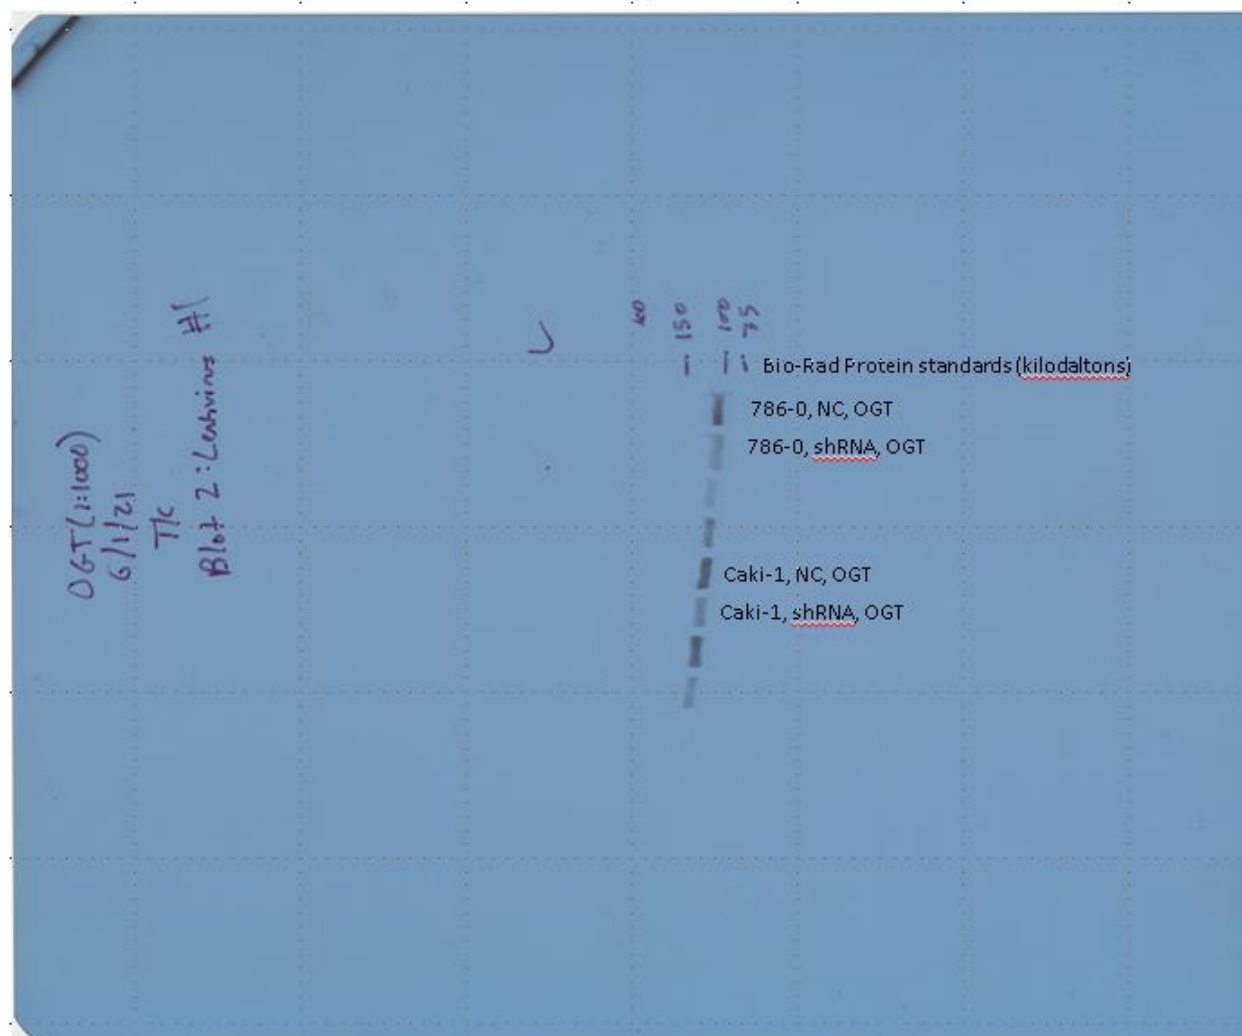

**Figure S12.:** Original representative blot for the OGT protein expression of the cell lines 786-O and Caki-1 treated with OGT shRNA
